# Supplementary material for: Inhibiting Monocyte Recruitment to Prevent the Pro-Tumoral Activity of Tumor-Associated Macrophages in Chondrosarcoma
Source: MDPI journal article supplement (doi:10.3390/cells9041062), 2020-04-24
Supplement: s1 [file s1]

# Supplementary Data

## Pearson's Correlation coefficients

|                      | CD68<br>Average | CD68<br>Score | CD163<br>Average | CD163<br>Score | iMVD<br>Average | iMVD<br>Score | PFS    |
|----------------------|-----------------|---------------|------------------|----------------|-----------------|---------------|--------|
| CD68 Average (n.18)  | 1               | 0,835         | 0,855            | 0,815          | 0,834           | 0,746         | 0.013  |
| CD68 Score (n.18)    | 0,835           | 1             | 0,897            | 0,911          | 0,752           | 0,657         | 0,044  |
| CD163 Average (n.18) | 0,855           | 0,897         | 1                | 0,959          | 0,929           | 0,882         | -0,485 |
| CD163 Score (n.18)   | 0,815           | 0,911         | 0,959            | 1              | 0,854           | 0,844         | -0,285 |
| iMVD Average (n.18)  | 0,834           | 0,752         | 0,929            | 0,854          | 1               | 0,962         | -0,573 |
| iMVD Score (n.18)    | 0,746           | 0,657         | 0,882            | 0,844          | 0,962           | 1             | -0,426 |
| PFS (n.8)            | 0.013           | 0,044         | -0,485           | -0,285         | -0,573          | -0,426        | 1      |

**Figure S1. Relationship between CD68 and CD163 and CD31 expression levels in tumor tissues and progression free survival of CHS patients.**

Values of Pearson's correlation coefficient referred to the correlation between CD68<sup>+</sup>, CD163<sup>+</sup> and intratumor microvessel density(iMVD) CD31 averages and scores, and progression free survival,were assessed by using the SPSS 20.0 software. In parentheses is the number of analyzed cases.

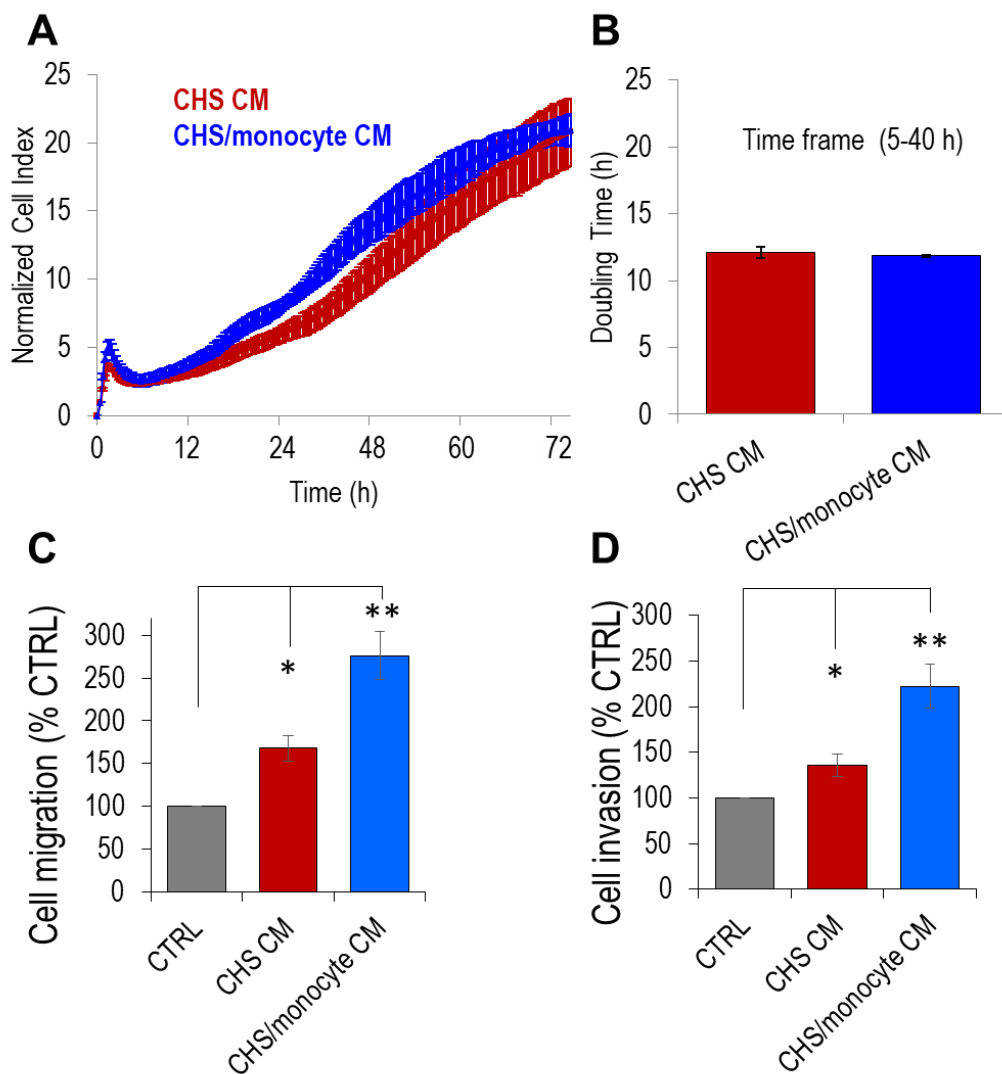

**Figure S2. Proliferation and migration rate of CHS cells.**

Proliferation rate of primary CHS cells derived from the tumor tissue #9 assessed by monitoring impedance by RTCA xCELLigence Technology. **A.** Primary CHS cells were seeded in E-plates in CM from CHS cells or CM from human monocytes pre-co-cultured with CHS cells. In all cases, serum was added to a 5% final concentration. **B.** Doubling times were calculated from the cell growth curves, during exponential growth (time frame: 5-40 h). Data represent mean  $\pm$  SD from a quadruplicate experiment representative of 3 replicates. **C-D.** Cell migration (**C**) and invasion (**D**) of CHS cells in Boyden chambers. CHS cells were allowed to migrate (**C**) or invade matrigel (**D**) toward serum-free medium (CTRL), CM of human monocytes recovered after monocyte/CHS co-cultures or control CM from CHS cells alone. In all cases, FBS was added to a 5% final concentration in the lower compartment of Boyden chambers. For quantitative analysis, values were reported as percentage of the CTRL, considered as 100%. Data are the means  $\pm$  SD of three independent experiments, performed in triplicate. Statistical significance with  $*p < 0.005$  and  $**p < 0.001$ .

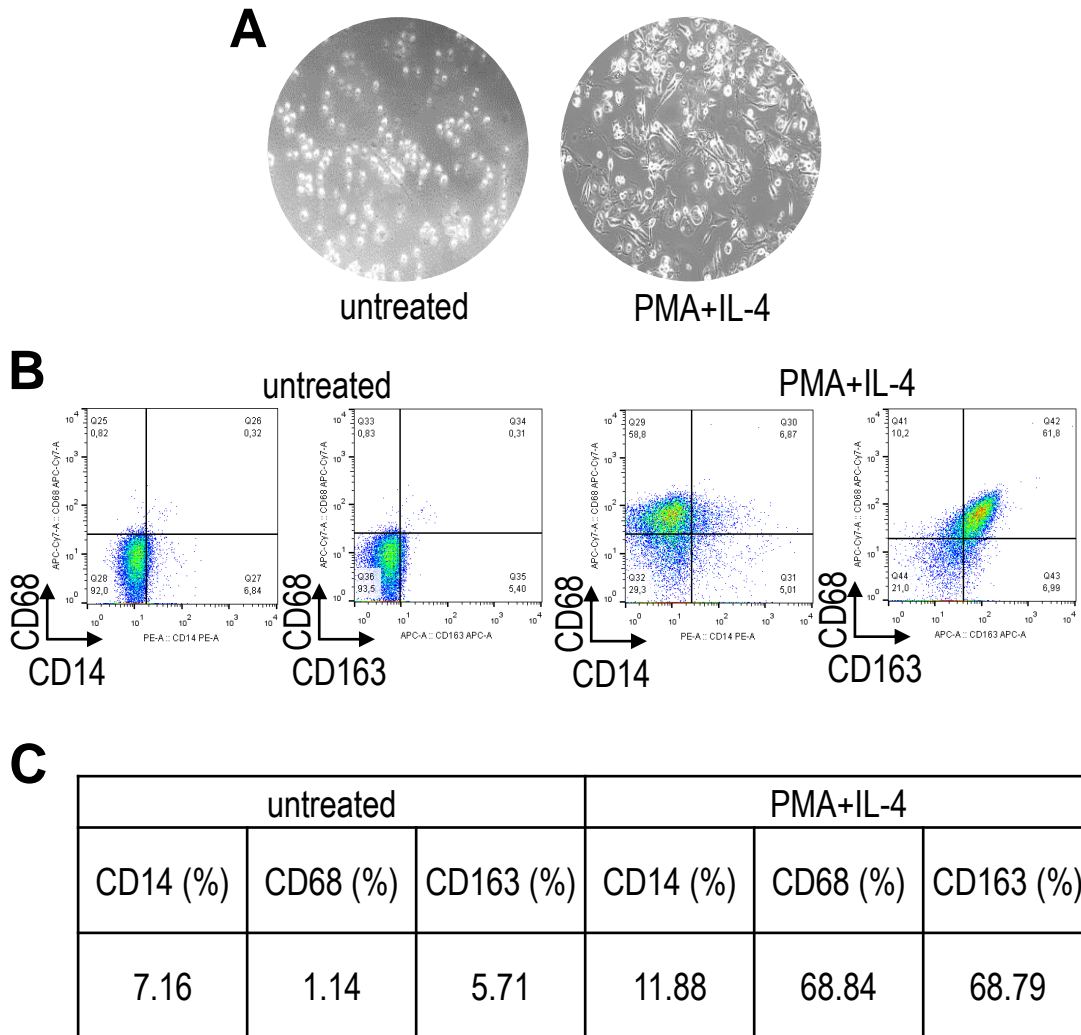

**Figure S3. Flow Cytometric analysis of CD68 and CD163 expression in untreated and PMA/IL-4-treated THP-1 cells.** Untreated and PMA/IL-4-treated THP-1 cells (A) analyzed for CD14, CD68 and CD163 expression by flow cytometry (B). Percent of cells expressing CD14, CD68 and CD163 in untreated THP-1 cells and in cells treated with PMA/IL-4.
